# Supplementary material
Source: PubMed Central journal article supplement (PMC3260493)
Supplement: ismej2011100x1.pdf [file ismej2011100x1.pdf]

**Table S1.** Primers and PCR conditions used in this paper

| Primers                                                 | Sequence (5' – 3')                               | Thermal conditions                                                                                                                                                               | Reference              |
|---------------------------------------------------------|--------------------------------------------------|----------------------------------------------------------------------------------------------------------------------------------------------------------------------------------|------------------------|
| <b>Rhizobacteria</b>                                    |                                                  |                                                                                                                                                                                  |                        |
| 27F                                                     | AAC MGG ATT AGA TAC CCK G                        | 94°C, 5 min, 1 cycle                                                                                                                                                             | Lane, 1990             |
| 1492R                                                   | GGY TAC CTT GTT ACG ACT T                        | 94°C for 1 min, 48-58°C (gradient = 48.0, 48.3, 48.9, 49.7, 113 50.8, 52.3, 54.0, 55.4, 56.5, 57.3, 57.8, 58.0°C) for 45 s, 72°C for 1 min, 30 cycles<br>72°C for 8 min, 1 cycle |                        |
| <b>Detection of 'Candidatus Liberibacter asiaticus'</b> |                                                  |                                                                                                                                                                                  |                        |
| <b>Conventional PCR</b>                                 |                                                  |                                                                                                                                                                                  |                        |
| A2                                                      | TAT AAA GGT TGA CCT TTC GAG TTT                  | 94°C for 2 min, 1 cycle,                                                                                                                                                         | Hocquellet et al, 1999 |
| J5                                                      | ACA AAA GCA GAA ATA GCA CGA ACA A                | 94°C for 10 s, 65°C for 10s, 72°C for 1 min, 35 cycles 72°C for 4 min, 1 cycle                                                                                                   |                        |
| <b>qPCR</b>                                             |                                                  |                                                                                                                                                                                  |                        |
| CQULA04F                                                | TGG AGG TGT AAA AGT TGC CAA A                    | 50°C for 2 min, 1 cycle                                                                                                                                                          | Wang et al., 2006      |
| CQULAP10P                                               | ATC GTC TCG TCA AGA TTG CTA TCC<br>GTG ATA CTA G | 95°C for 15 min, 1 cycle                                                                                                                                                         |                        |
| CQULA04R                                                | CCA ACG AAA AGA TCA GAT ATT CCT<br>CTA           | 94°C for 15 s and 60°C for 1 min, 45 cycles                                                                                                                                      |                        |
|                                                         |                                                  |                                                                                                                                                                                  |                        |
| <b>Taxon/Group specific qPCR</b>                        |                                                  |                                                                                                                                                                                  |                        |
| <b>Total bacteria</b>                                   |                                                  |                                                                                                                                                                                  |                        |
| Eub338                                                  | ACT CCT ACG GGA GGC AGC AG                       | 95°C, 15 min, 1 cycle                                                                                                                                                            | Fierer et al., 2005    |
| Eub518                                                  | ATT ACC GCG GCT GCT GG                           | 95°C for 1 min, 53°C for 30 s, 72°C for 1 min, 40 cycles                                                                                                                         |                        |
| <b>Acidobacteria</b>                                    |                                                  |                                                                                                                                                                                  |                        |
| Acid31                                                  | GAT CCT GGC TCA GAA TC                           | 95°C, 15 min, 1 cycle                                                                                                                                                            | Fierer et al., 2005    |
| Eub518                                                  | ATT ACC GCG GCT GCT GG                           | 95°C for 1 min, 50°C for 30 s, 72°C for 1 min, 40 cycles                                                                                                                         |                        |
| <b>Actinobacteria</b>                                   |                                                  |                                                                                                                                                                                  |                        |
| Actino235                                               | CGC GGC CTA TCA GCT TGT TG                       | 95°C, 15 min, 1 cycle                                                                                                                                                            | Fierer et al., 2005    |
| Eub518                                                  | ATT ACC GCG GCT GCT GG                           | 95°C for 1 min, 60°C for 30 s, 72°C for 1 min, 40 cycles                                                                                                                         |                        |
| <b>Alphaproteobacteria</b>                              |                                                  |                                                                                                                                                                                  |                        |
| Eub338                                                  | ACT CCT ACG GGA GGC AGC AG                       | 95°C, 15 min, 1 cycle                                                                                                                                                            | Fierer et al., 2005    |
| Alfa685                                                 | TCT ACG RAT TTC ACC YC TAC                       | 95°C for 1 min, 60°C for 30 s, 72°C for 1 min, 40 cycles                                                                                                                         |                        |

|                                                   |                                 |                                                                                            |                             |
|---------------------------------------------------|---------------------------------|--------------------------------------------------------------------------------------------|-----------------------------|
| <b><i>Bacteroidetes</i></b>                       |                                 | 95°C, 15 min, 1 cycle                                                                      | Fierer <i>et al.</i> , 2005 |
| Cfb319                                            | GTA CTG AGA CAC GGA CCA         | 95°C for 1 min, 65°C for 30 s, 72°C for 1 min, 40 cycles                                   |                             |
| Eub518                                            | ATT ACC GCG GCT GCT GG          |                                                                                            |                             |
| <b><i>Betaproteobacteria</i></b>                  |                                 | 95°C, 15 min, 1 cycle                                                                      | Fierer <i>et al.</i> , 2005 |
| Eub338                                            | ACT CCT ACG GGA GGC AGC AG      | 95°C for 1 min, 60°C for 30 s, 72°C for 1 min, 40 cycles                                   |                             |
| Bet680                                            | TCA CTG CTA CAC GYG             |                                                                                            |                             |
| <b><i>Firmicutes</i></b>                          |                                 | 95°C, 15 min, 1 cycle                                                                      | Fierer <i>et al.</i> , 2005 |
| Lgc353                                            | GCA GTA GGG AAT CTT CCG         | 95°C for 1 min, 60°C for 30 s, 72°C for 1 min, 40 cycles                                   |                             |
| Eub518                                            | ATT ACC GCG GCT GCT GG          |                                                                                            |                             |
| <b><i>Pseudomonas spp.</i></b>                    |                                 | 95°C, 15 min, 1 cycle                                                                      | Drigo <i>et al.</i> , 2009  |
| PsF                                               | TTA GCT CCA CCT CGC GGC         | 95°C for 1 min, 64°C for 30 s, 72°C for 1 min, 40 cycles                                   |                             |
| PsR                                               | GGT CTG AGA GGA TGA TCA GT      |                                                                                            |                             |
| <b><i>Burkholderia spp.</i></b>                   |                                 | 95°C, 15 min, 1 cycle                                                                      | Drigo <i>et al.</i> , 2009  |
| Burk3                                             | CTG CGA AAG CCG GAT             | 95°C for 1 min, 64°C for 30 s, 72°C for 1 min, 40 cycles                                   |                             |
| BurkR                                             | TGC CAT ACT CTA GCY YGC         |                                                                                            |                             |
| <b><i>Bacillus spp.</i></b>                       |                                 | 95°C, 15 min, 1 cycle                                                                      | Drigo <i>et al.</i> , 2009  |
| BacF                                              | GGG AAA CCG GGG CTA ATA CCG GAT | 95°C for 1 min, 63°C for 30 s, 72°C for 1 min, 40 cycles                                   |                             |
| 1378                                              | CGG TGT GTA CAA GGC CCG GGA ACG |                                                                                            |                             |
| <b>qPCR of genes involved in nitrogen cycling</b> |                                 |                                                                                            |                             |
| <b><i>narG</i></b>                                |                                 | 95°C, 15 min, 1 cycle                                                                      | Hallin <i>et al.</i> , 2009 |
| narG1960m2F                                       | TAY GTS GGG CAG GAR AAA CTG     | 95°C for 15 s, 65 to 60°C for 30 s (-1°C by cycle), 72°C for 30 s, 80°C for 15 s, 6 cycles |                             |
| narG2050m2R                                       | CGT AGA AGA AGC TGG TGC TGT T   | 95°C for 15 s, 60°C for 30 s, 72°C for 30 s, 80°C for 15 s, 40 cycles                      |                             |
|                                                   |                                 | 95°C for 15 s, 60 to 95°C, 1 cycle                                                         |                             |
| <b><i>nirK</i></b>                                |                                 | 95°C, 15 min, 1 cycle                                                                      | Hallin <i>et al.</i> , 2009 |
| nirK876                                           | ATY GGC GGV CAY GGC GA          | 95°C for 15 s, 63 to 58°C for 30 s (-1°C by cycle), 72°C for 30 s, 80°C for 15 s, 6 cycles |                             |
| nirK1040                                          | GCC TCG ATC AGR TTR TGG TT      |                                                                                            |                             |

|                                                   |                                                               |                                                                                                                                                                                                                                                                                                                                                                                        |                             |
|---------------------------------------------------|---------------------------------------------------------------|----------------------------------------------------------------------------------------------------------------------------------------------------------------------------------------------------------------------------------------------------------------------------------------------------------------------------------------------------------------------------------------|-----------------------------|
| <b><i>nirS</i></b><br>nirSCd3aFm<br>nirSR3cdm     | AAC GYS AAG GAR ACS GG<br>GAS TTC GGR TGS GTC TTS AYG AA      | 95°C for 15 s, 60°C for 30 s, 72°C for 30 s,<br>80°C for 15 s, 40 cycles<br>95°C for 15 s, 60 to 95°C, 1 cycle<br>95°C, 15 min, 1 cycle<br>95°C for 15 s, 65 to 60°C for 30 s (-1°C by<br>cycle), 72°C for 30 s, 80°C for 15 s, 6<br>cycles<br>95°C for 15 s, 60°C for 30 s, 72°C for 30 s,<br>80°C for 15 s, 40 cycles<br>95°C for 15 s, 60 to 95°C, 1 cycle<br>95°C, 15 min, 1 cycle | Hallin <i>et al.</i> , 2009 |
| <b><i>nosZ</i></b><br>nosZ2F<br>nosZ2R´           | CGC RAC GGC AAS AAG GTS MSS GT<br>CAK RTG CAK SGC RTG GCA GAA | 95°C for 15 s, 65 to 60°C for 30 s (-1°C by<br>cycle), 72°C for 30 s, 80°C for 15 s, 6<br>cycles<br>95°C for 15 s, 60°C for 30 s, 72°C for 30 s,<br>80°C for 15 s, 40 cycles<br>95°C for 15 s, 60 to 95°C, 1 cycle<br>95°C, 10 min, 1 cycle                                                                                                                                            | Hallin <i>et al.</i> , 2009 |
| <b><i>amoA(AOB)</i></b><br>amoA-1F<br>amoA-2R     | GGG GTT TCT ACT GGT GGT<br>CCC CTC KGS AAA GCC TTC TTC        | 94°C for 45 s, 58°C for 45 s, 72°C for 45 s,<br>39 cycles<br>95°C for 15 s, 60°C for 30 s, to 95°C for 15<br>s, 1 cycle                                                                                                                                                                                                                                                                | Hallin <i>et al.</i> , 2009 |
| <b><i>amoA(AOA)</i></b><br>19F<br>CrenamoA616r48x | ATG GTC TGG CTW AGA CG<br>GCC ATC CAB CKR TAN GTC CA          | 95°C, 10 min, 1 cycle<br>94°C for 45 s, 55°C for 45 s, 72°C for 45 s,<br>39 cycles<br>95°C for 15 s, 60°C for 30 s, to 95°C for 15<br>s, 1 cycle                                                                                                                                                                                                                                       | Hallin <i>et al.</i> , 2009 |

References:

- Drigo B, van Veen JA, Kowalchuk GA. (2009). Specific rhizosphere bacterial and fungal groups respond to elevated atmospheric CO<sub>2</sub>. *ISME J* **3**: 1204–1217.
- Fierer N, Jackson JA, Vilgalys R, Jackson RB. (2005). The assessment of soil microbial community structure by use of taxon-specific quantitative PCR assays. *Appl Environ Microbiol* **71**: 4117-4120.
- Hallin S, Jones CJ, Schloter M, Philippot L. (2009). Relationship between N-cycling communities and ecosystem functioning in a 50-year-old fertilization experiment. *ISME J*. **3**: 597–605
- Hocquellet A, Bové JM, Garnier M. (1999). Isolation of DNA from the uncultured "*Candidatus Liberobacter*" species associated with citrus huanglongbing by RAPD. *Curr Microbiol* **38**: 176-182.
- Lane DJ. (1990). 16S/23S rRNA sequencing In: Stackebrandt E, Goodfellow M (eds.) *Nucleic acid techniques in bacterial systematics*. John Wiley & Sons-New York, 115-147pp.
- Wang Z, Yin Y, Hu H, Yuan Q, Peng G, Xia Y. (2006). Development and application of molecular-based diagnosis for '*Candidatus Liberibacter asiaticus*', the causal pathogen of citrus huanglongbing. *Plant Pathol* **55**: 630–638.

Figure S1. Rarefaction curves of 16S rRNA gene clone libraries from the rhizosphere of healthy citrus (HT1, HT2, and HT3); '*Ca. Liberibacter asiaticus*' infected citrus (IT1, IT2, and IT3); and bulk soil samples.

Figure S2. Relative abundances of the different bacterial phyla/genus in the rhizosphere of healthy (HT1, HT2, HT3); '*Ca. Liberibacter asiaticus*' infected citrus (IT1, IT2, and IT3); and bulk soil samples, as estimated using the qPCR assays. Error bars represent the standard errors of the means for three replicates. Statistical significance is represented by letters above each bar, with different letters signifying differences at  $P \leq 0.01$  for each bacterial phyla/genus.

Figure S3. Hierarchical cluster analysis of (A) ribulose-1, 5-bisphosphate carboxylase / oxygenase (Rubisco); (B) carbon monoxide dehydrogenase (CODH); and (C) propionyl-CoA / acetyl-CoA carboxylase (PCC / ACC) genes in rhizosphere of '*Ca. L. asiaticus*' infected (IT1-IT3) or healthy (HT1-HT3) citrus. Genes that were present in at least three samples were used for cluster analysis. Results were generated in CLUSTER and visualized using TREEVIEW. Red indicates signal intensities above background while black indicates signal intensities below background. Brighter red colouring indicates higher signal intensities.

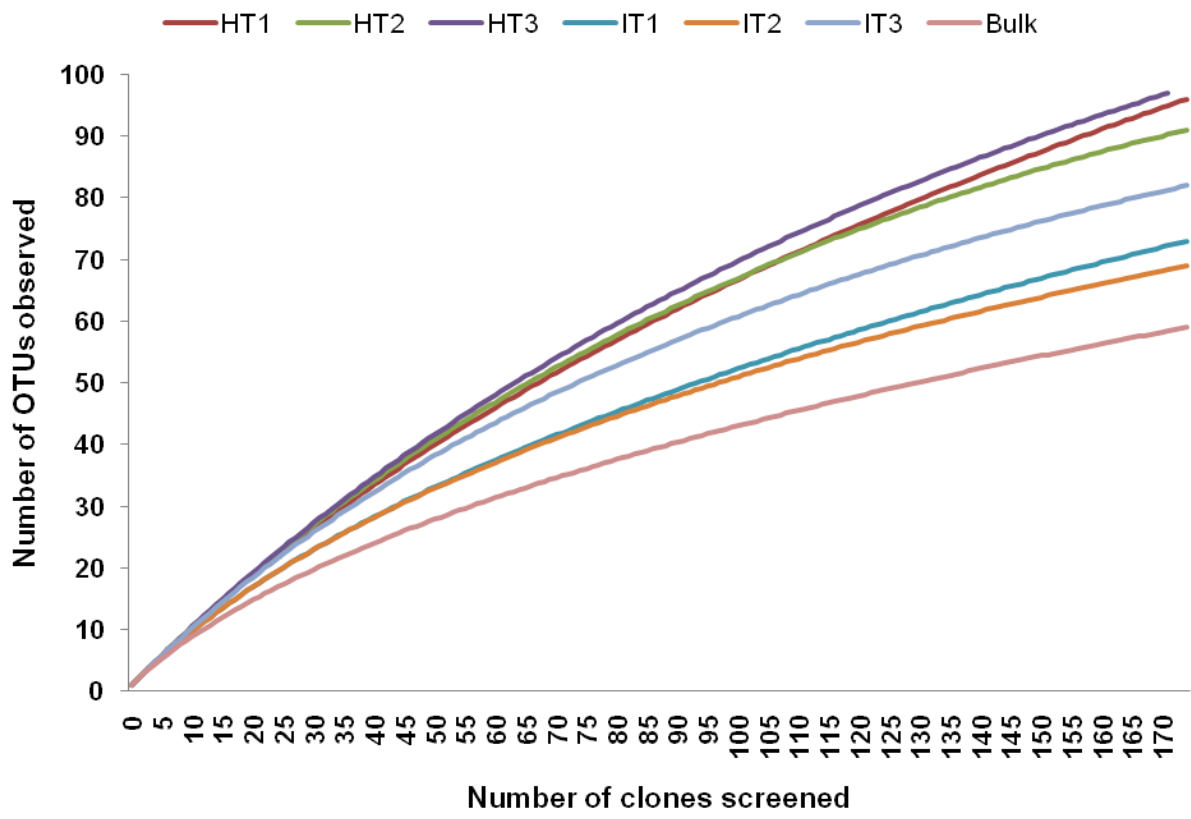

Fig. S1

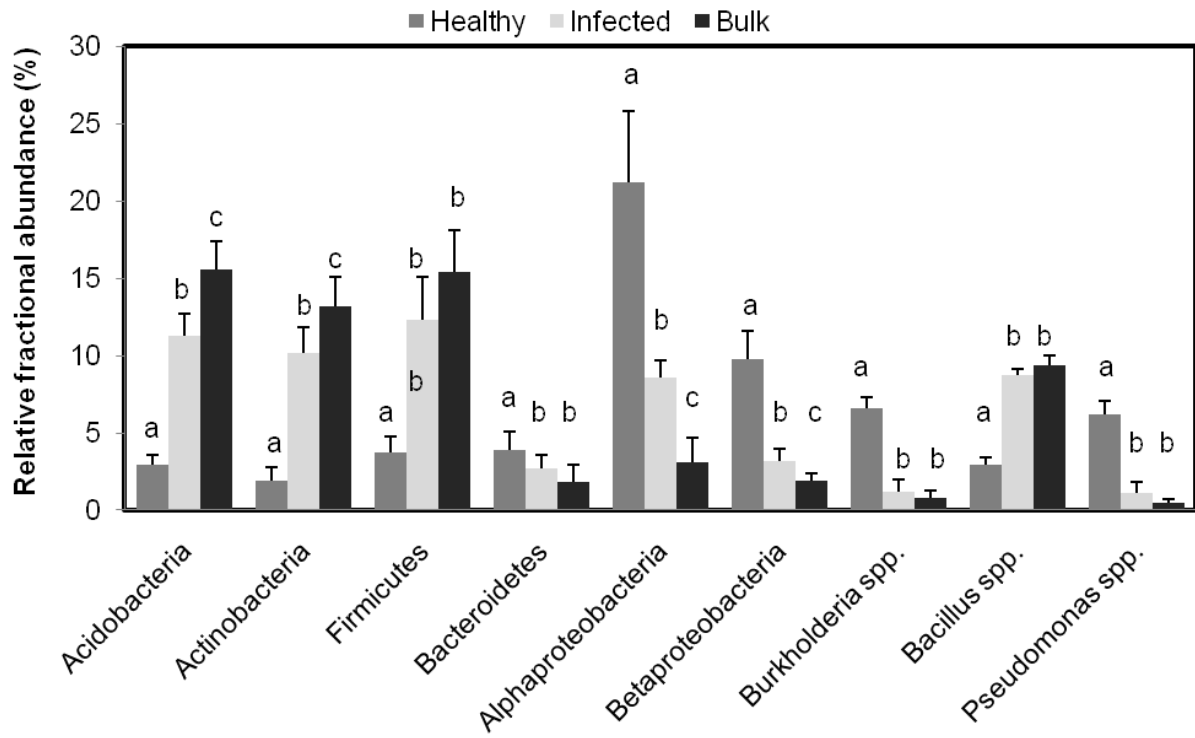

Fig. S2

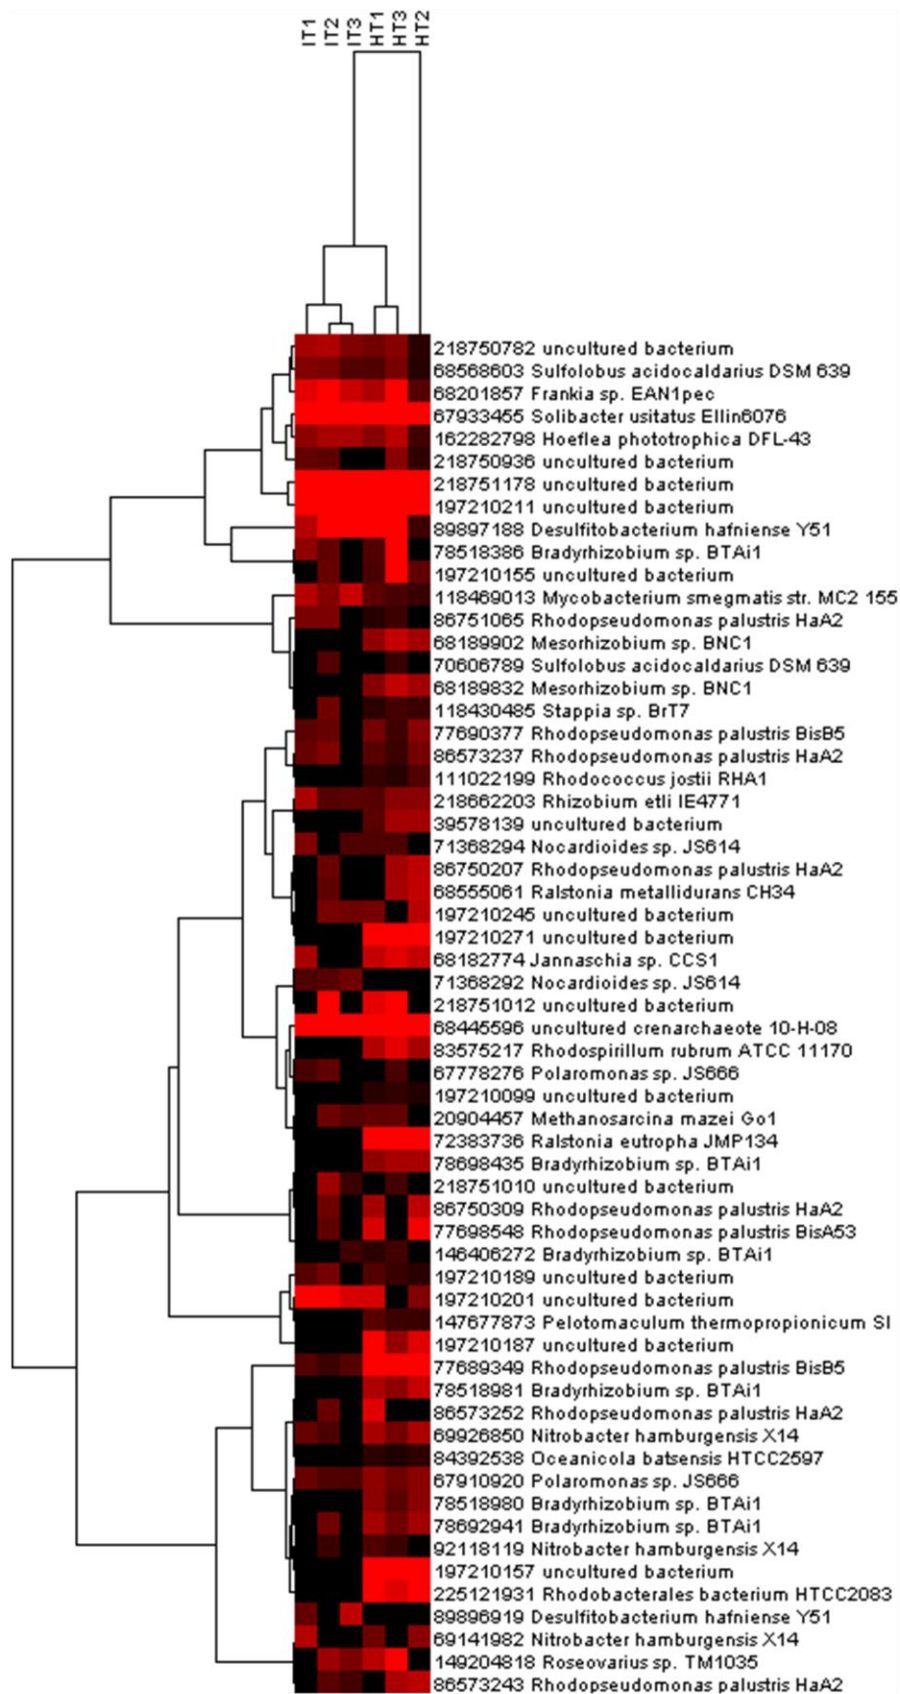

Fig. S3A



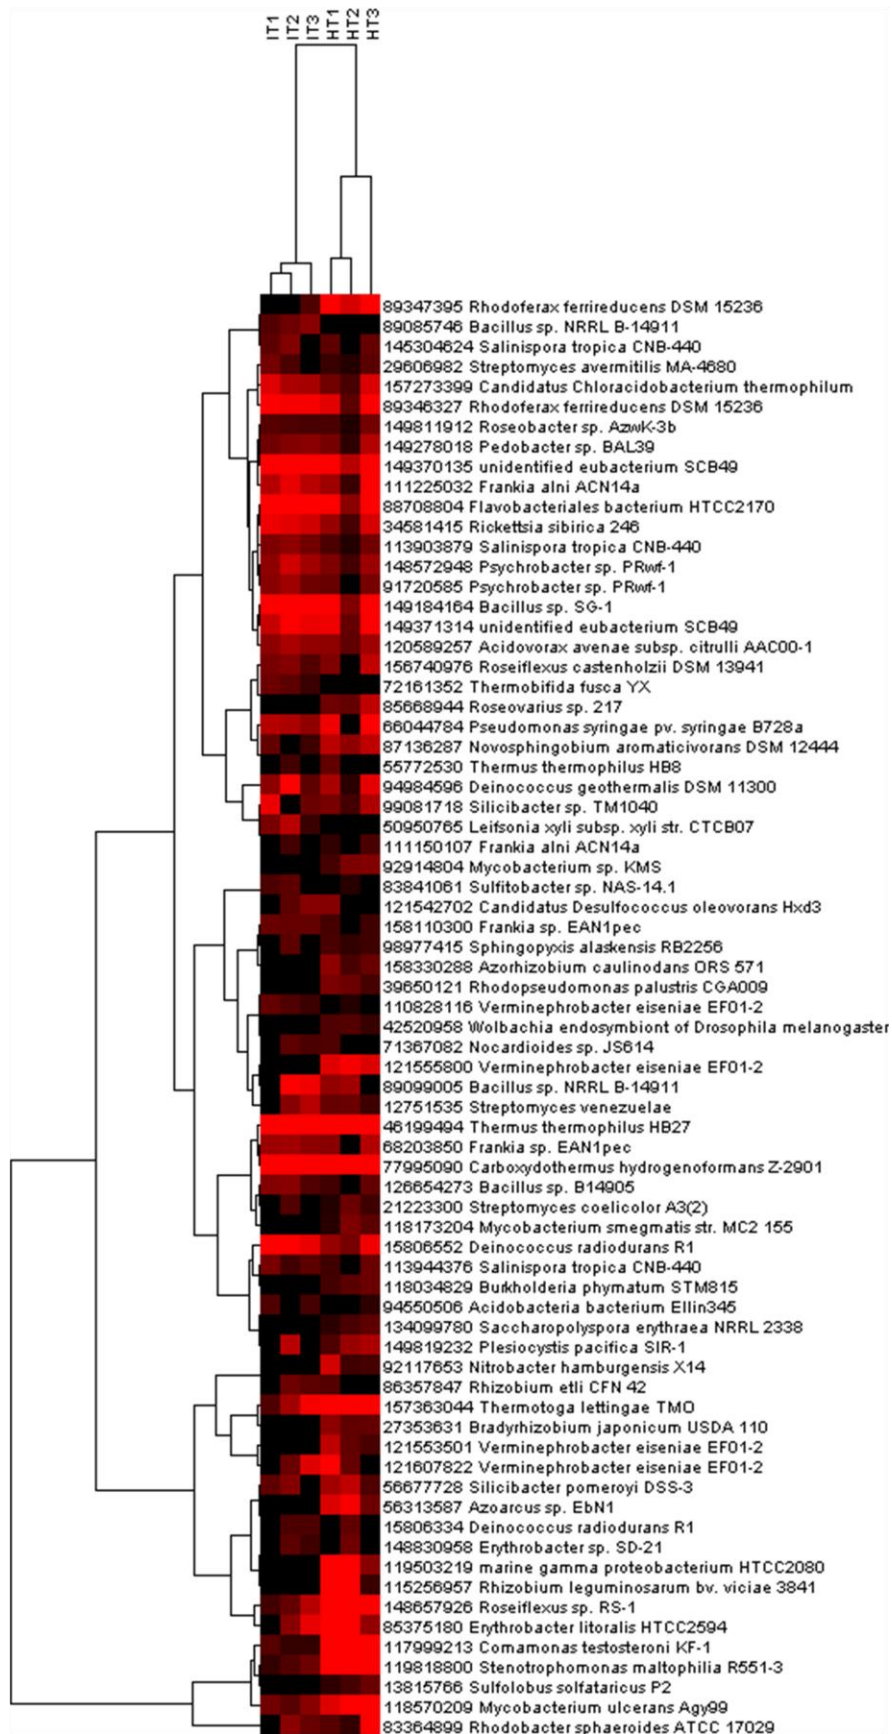

Fig. S3B

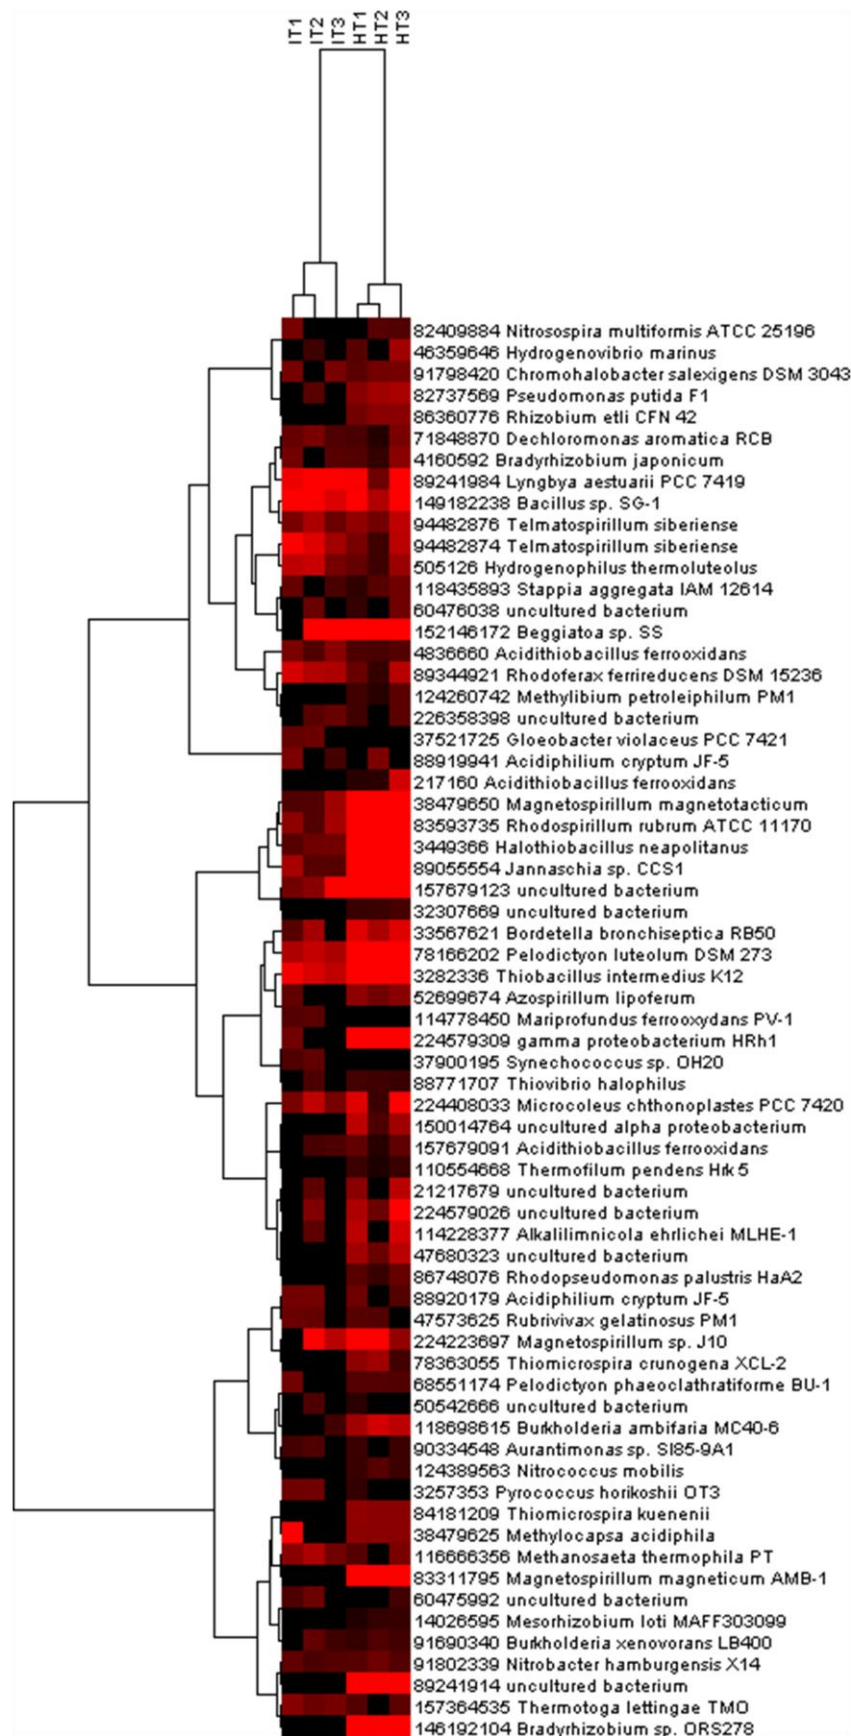

Fig. S3C
